# Supplementary material for: Structure and photoluminescence properties of a rare-earth free red-emitting Mn2+-activated KMgBO3
Source: Royal Society of Chemistry journal article supplement (doi:10.1039/c4dt01524j), 2014-01-01
Supplement: c4dt01524j1.pdf [file c4dt01524j1.pdf]

## Structure and photoluminescence properties of a rare-earth free red-emitting Mn<sup>2+</sup>-activated KMgBO<sub>3</sub>

L. Wu<sup>a</sup>, B. Wang<sup>a, b</sup>, Y. Zhang<sup>b\*</sup>, L. Li<sup>c</sup>, H. R. Wang<sup>b</sup>, H. Yi<sup>a</sup>, Y. F. Kong<sup>a</sup> and J. J. Xu<sup>a</sup>

<sup>a</sup> The MOE key laboratory of weak-Light Nonlinear Photonics, School of Physics, Nankai University, Tianjin 300071, China.

<sup>b</sup> Institute of Photo-electronic Thin Film Devices and Technology, Key Laboratory of Photo-electronic Thin Film Devices and Technology of Tianjin, Nankai University, Tianjin 300071, PR China. Email: [yizhang@nankai.edu.cn](mailto:yizhang@nankai.edu.cn), Tel: +86-22-23508572-8018, Fax: +86-22-23508912

<sup>c</sup> Tianjin Key Laboratory of Photoelectronic Materials and Device, Tianjin University of Technology, Tianjin 300191.

Table S1 Lattice parameters and fractional atomic site of  $\text{KMg}_{0.91}\text{Mn}_{0.09}\text{BO}_3$ 

| lattice |      | a=6.8494(1) Å |           | V=321.33(1) Å <sup>3</sup> |        |
|---------|------|---------------|-----------|----------------------------|--------|
| atom    | site | x             | y         | z                          | Occ.   |
| K       | 4a   | 0.1332(3)     | 0.1332(1) | 0.1332(2)                  | 1.0000 |
| Mg      | 4a   | 0.8543(2)     | 0.8543(2) | 0.8543(1)                  | 0.9153 |
| Mn      | 4a   | 0.8543(2)     | 0.8543(2) | 0.8543(1)                  | 0.0847 |
| B       | 12b  | 0.3997(2)     | 0.3997(2) | 0.3997(2)                  | 1.0000 |
| O       | 4a   | 0.4152(1)     | 0.2576(1) | 0.5373(2)                  | 1.0000 |

Table S2 Fractional bond length and angle of  $\text{KMg}_{0.91}\text{Mn}_{0.09}\text{BO}_3$ 

| Bonds            | Distances(Å) | Bonds                 | Distances(Å) | Bonds                            | Distances(Å) |
|------------------|--------------|-----------------------|--------------|----------------------------------|--------------|
| K-O <sup>c</sup> | 2.8066(2)    | Mg(Mn)-O <sup>b</sup> | 2.0977(1)    | B-O                              | 1.3594(2)    |
| K-O <sup>g</sup> | 2.8066(2)    | Mg(Mn)-O <sup>f</sup> | 2.0977(1)    | B-O <sup>d</sup>                 | 1.3594(2)    |
| K-O <sup>k</sup> | 2.8066(2)    | Mg(Mn)-O <sup>i</sup> | 2.0977(1)    | B-O <sup>h</sup>                 | 1.3594(2)    |
| K-O <sup>a</sup> | 2.7764(1)    | Mg(Mn)-O <sup>g</sup> | 2.1561(2)    | O-B-O <sup>d</sup>               | 119.898(1)   |
| K-O <sup>e</sup> | 2.7764(1)    | Mg(Mn)-O <sup>c</sup> | 2.1561(2)    | O-B-O <sup>h</sup>               | 119.898(1)   |
| K-O <sup>i</sup> | 2.7764(1)    | Mg(Mn)-O <sup>k</sup> | 2.1561(2)    | O <sup>d</sup> -B-O <sup>h</sup> | 119.898(1)   |

(a) x,y,z; (b) -x+1/2,y,z; (c) x+1/2,-y,z; (d) -x,-y,z; (e) x,y+1/2,z+1/2; (f) -x+1/2,y+1/2,z+1/2; (g) x+1/2, -y+1/2,z+1/2; (h) -x,-y+1/2,z+1/2
